# Supplementary material for: PAD-UFES-20: A skin lesion dataset composed of patient data and clinical images collected from smartphones
Source: PubMed Central journal article supplement (PMC7479321; doi:10.1016/j.dib.2020.106221), 2020-08-25
Supplement: mmc2.pdf [file mmc2.pdf]

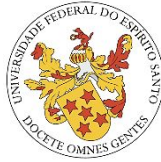

FEDERAL UNIVERSITY OF ESPÍRITO SANTO  
DERMATOLOGICAL AND SURGICAL ASSISTANCE PROGRAM

**CLINICAL APPOINTMENT QUESTIONNAIRE**

Patient's full name: \_\_\_\_\_

Healthcare ID Number: \_\_\_\_\_

**SESSION 1 – QUESTIONS ABOUT THE PATIENT**

- 1) Age: \_\_\_\_\_ years.
- 2) Gender: ( ) Male ( ) Female
- 3) Father's descendancy: \_\_\_\_\_
- 4) Mother's descendancy: \_\_\_\_\_
- 5) Does your house have piped water? ( ) Yes ( ) No
- 6) Does your house have a sewer system? ( ) Yes ( ) No
- 7) Do you smoke? ( ) Yes ( ) No
- 8) Do you drink alcohol? ( ) Yes ( ) No
- 9) Have you ever had skin cancer? ( ) Yes ( ) No
- 10) Has anyone in your family ever had any type of cancer? ( ) Yes ( ) No
- 11) Do you use pesticides at work? ( ) Yes ( ) No

**SESSION 2 – QUESTIONS ABOUT THE SKIN LESION**

- 1) Fitzpatrick Scale: ( ) I ( ) II ( ) III ( ) IV ( ) V ( ) VI
- 2) Anatomical region: \_\_\_\_\_
- 3) Horizontal diameter: \_\_\_\_\_
- 4) Vertical diameter: \_\_\_\_\_

- 5) Has it itched?  Yes  No
- 6) Has it grown?  Yes  No
- 7) Does it hurt?  Yes  No
- 8) Has it changed its appearance?  Yes  No
- 9) Has it bled?  Yes  No
- 10) Does it have an elevation?  Yes  No
- 11) Clinical diagnostic:

---

---

**SESSION 3 – ANATOMOPATHOLOGICAL EXAMINATION\***

Result of excisional biopsy:

---

---

---

---

\* If applicable.

Date: \_\_\_\_\_.

|                                                 |
|-------------------------------------------------|
| <b>STAMP AND SIGNATURE OF<br/>THE PHYSICIAN</b> |
|                                                 |
